# Supplementary material
Source: PubMed Central journal article supplement (PMC3162109)
Supplement: NIHMS290511-supplement-01.pdf [file NIHMS290511-supplement-01.pdf]

### Supplemental Information

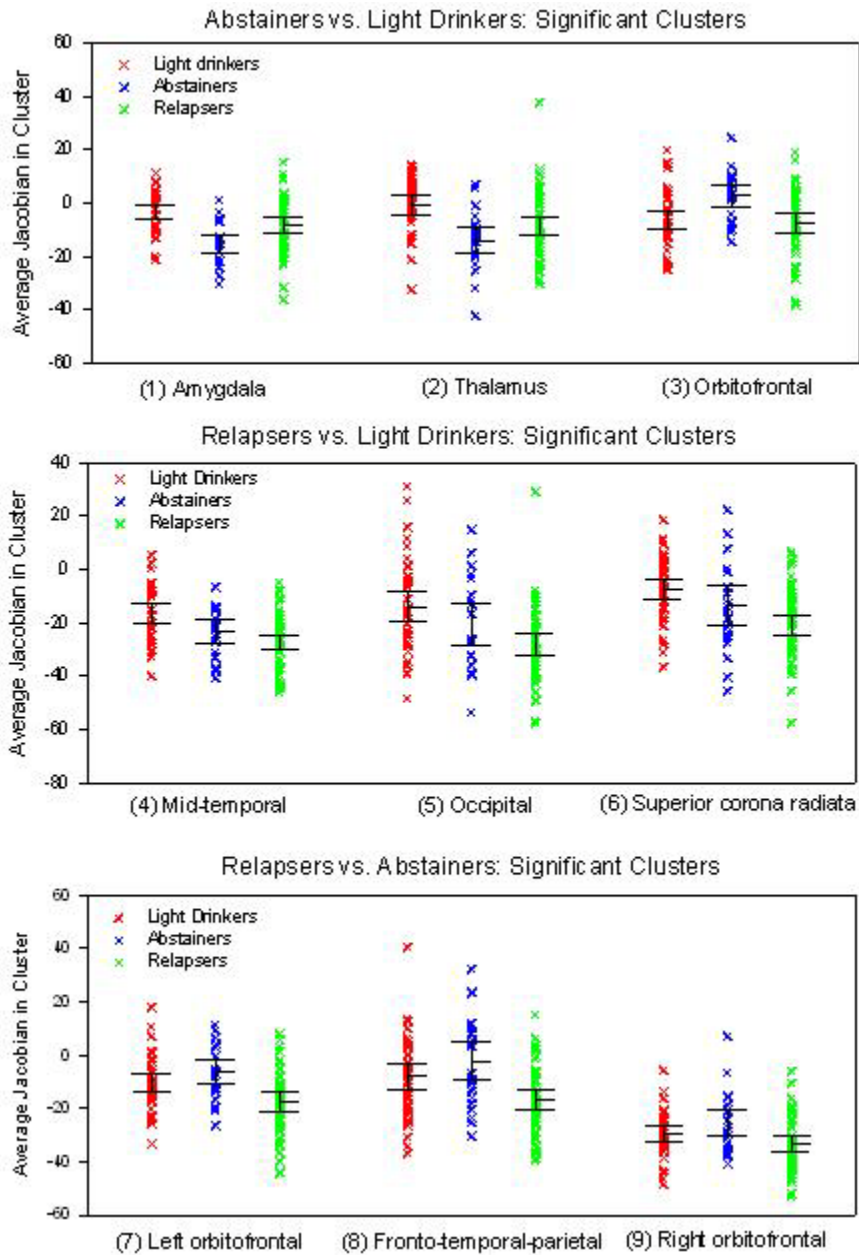

**Figure S1.** Scatterplot of significant cluster volumes for each group. Means and 95% confidential intervals for means are overlaid.
